# Supplementary material for: Humoral Immune Responses in Patients with Severe COVID-19: A Comparative Study between Individuals Infected by SARS-CoV-2 during the Wild-Type and the Delta Periods
Source: Preprints.org preprint supplement (doi:10.20944/preprints202308.0931.v1), 2023-08-14
Supplement: Supplementary file 1 [file supplementary]

**Supplementary Table 1. Patients' characteristics.**

| Characteristics                                     | D614G period   | Delta period          | Total          | <i>p</i> -value |
|-----------------------------------------------------|----------------|-----------------------|----------------|-----------------|
| Females, n (%)                                      | 13 (48.1%)     | 13 (61.9%)            | 26 (54.2%)     | -               |
| Age (years), median (IQR)                           | 68 (IQR 61-72) | 73 (IQR 63-82)        | 68 (IQR 62-76) | 0.2127          |
| Days from symptoms' onset to sampling, median (IQR) | 21 (IQR 17-35) | 21 (IQR 18-32)        | 21 (IQR 18-33) | 0.5757          |
| COVID-19 severity, n (moderate/severe)              | 9/18           | 8/13                  | 17/31          | -               |
| Vaccine status, Not vaccinated                      | 100% (27/27)   | 100% (21/21)          | 100% (48/48)   | -               |
| Period of infection                                 | May–June 2020  | October–November 2021 |                | -               |

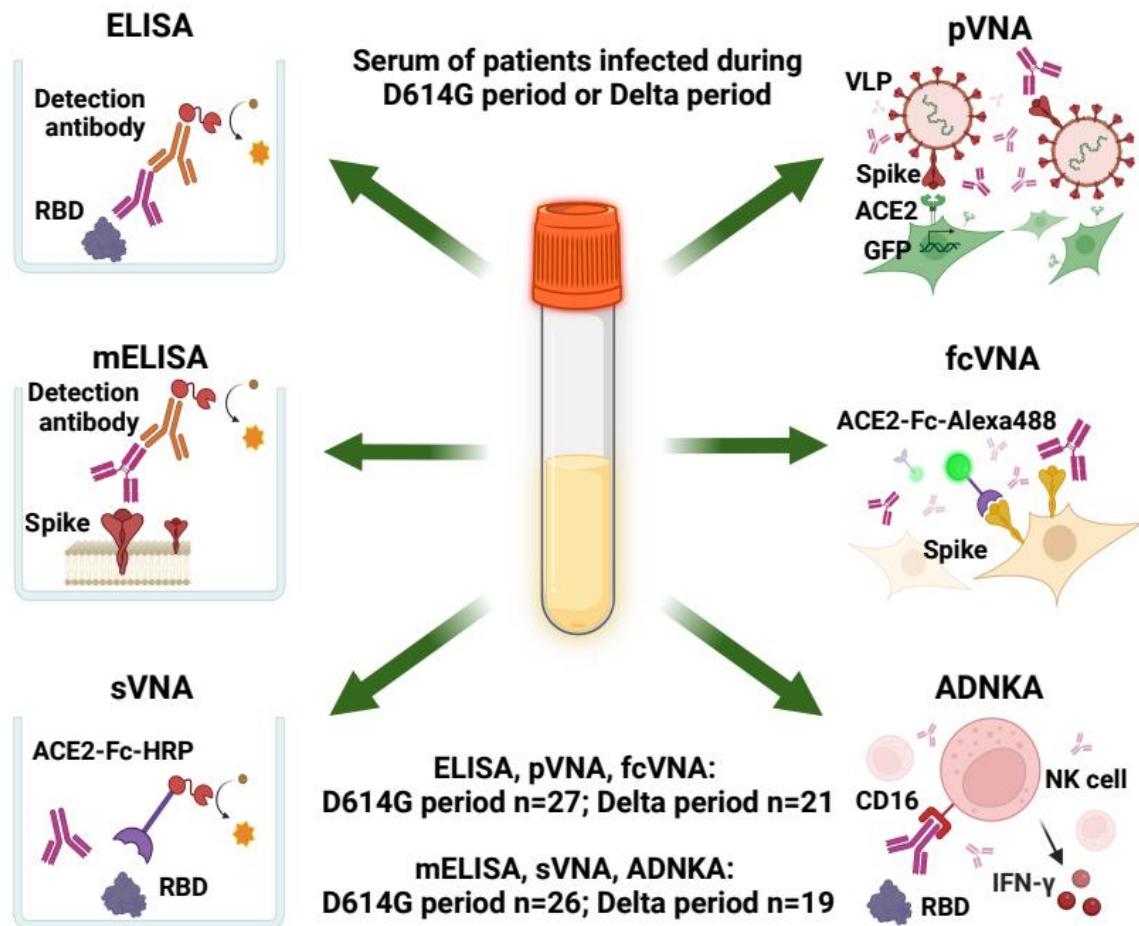

### Supplementary Figure 1. Study design.

The study included two groups of patients hospitalized for acute COVID-19. Serum samples were collected from patients who had been infected during D614G (n = 27) or Delta (n = 21) periods. Sera were tested for SARS-CoV-2 binding and neutralizing antibodies with six assays based on standard ELISA, cell-membrane-based ELISA (mELISA), surrogate or pseudotyped virus-neutralization assay (sVNA or pVNA), flow-cytometry-based surrogate virus-neutralization assay (fcVNA) and antibody-dependent NK cell activation (ADNKA) with RBD and Spike protein from wild type, Delta and Omicron BA.1 variants as antigen.

**A**

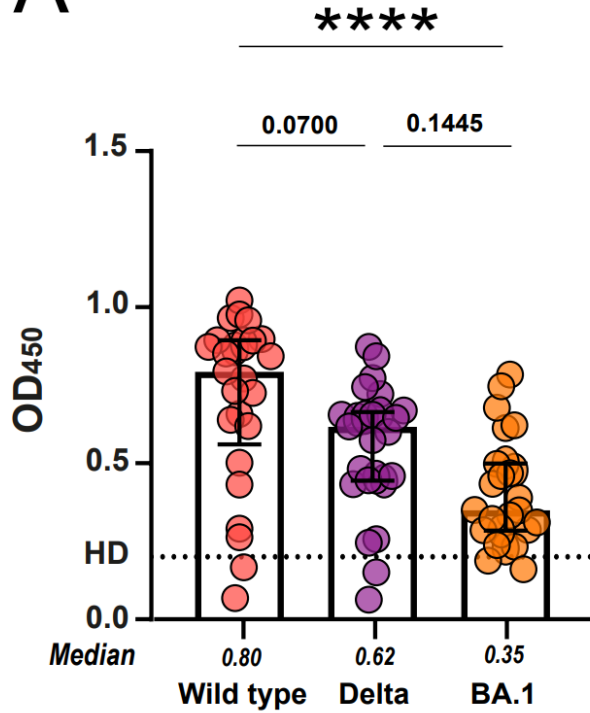

**B**

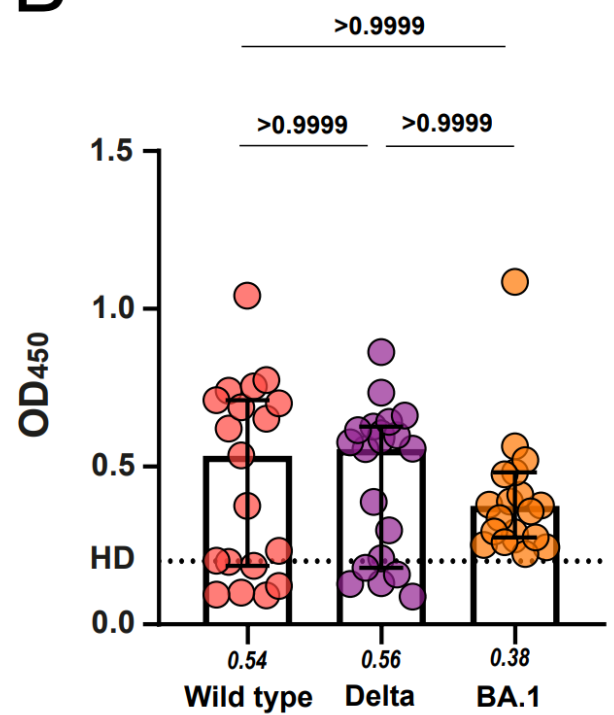

**Supplementary Figure 2.**

Reactivity of D614G (A) and Delta (B) period serum samples with WT, Delta, and BA.1 RBD in ELISA.

**A**

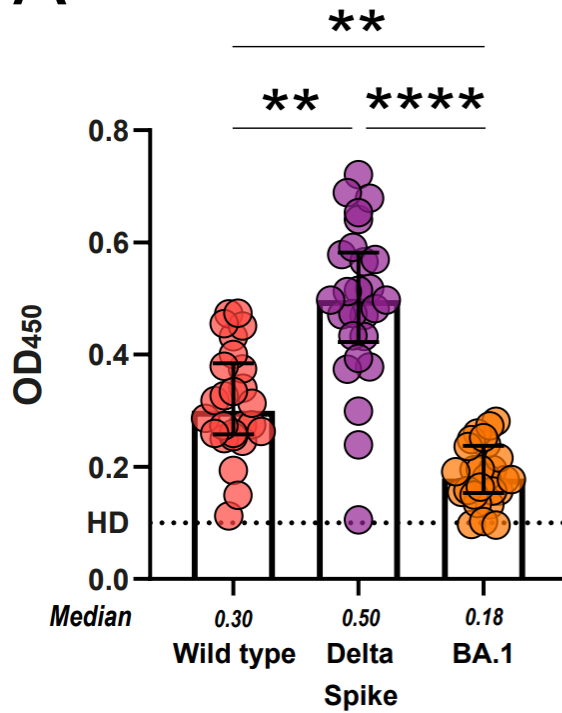

**B**

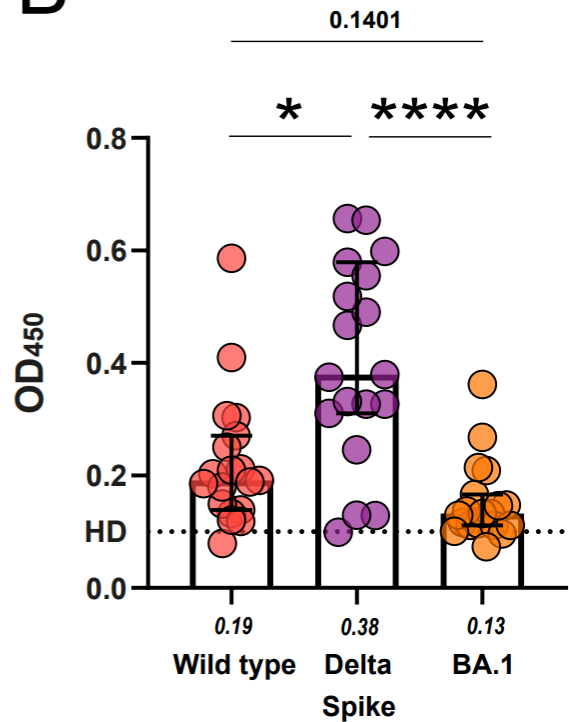

**Supplementary Figure 3.**

Reactivity of D614G (A) and Delta (B) period serum samples with WT, Delta, and BA.1 S protein in membrane-based ELISA (mELISA).

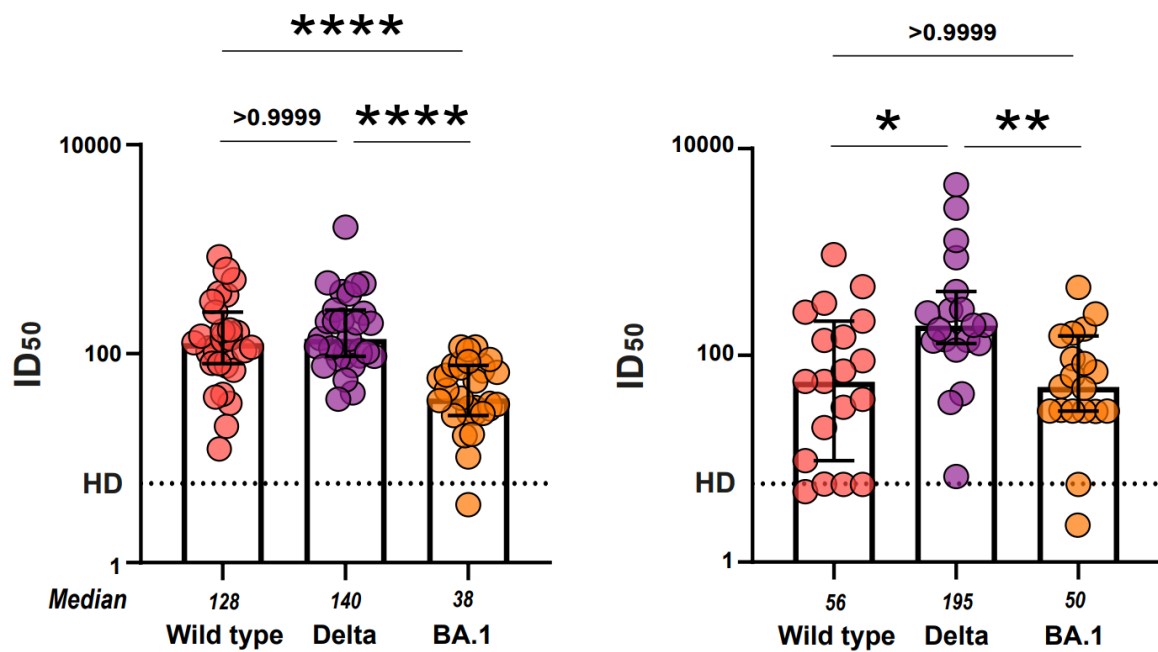

#### Supplementary Figure 4.

Neutralization antibody titers (ID<sub>50</sub> values) against VLP pseudotyped with WT, Delta, and BA.1 Spike variants in pseudotyped virus-neutralization assay (pVNA).

**A**

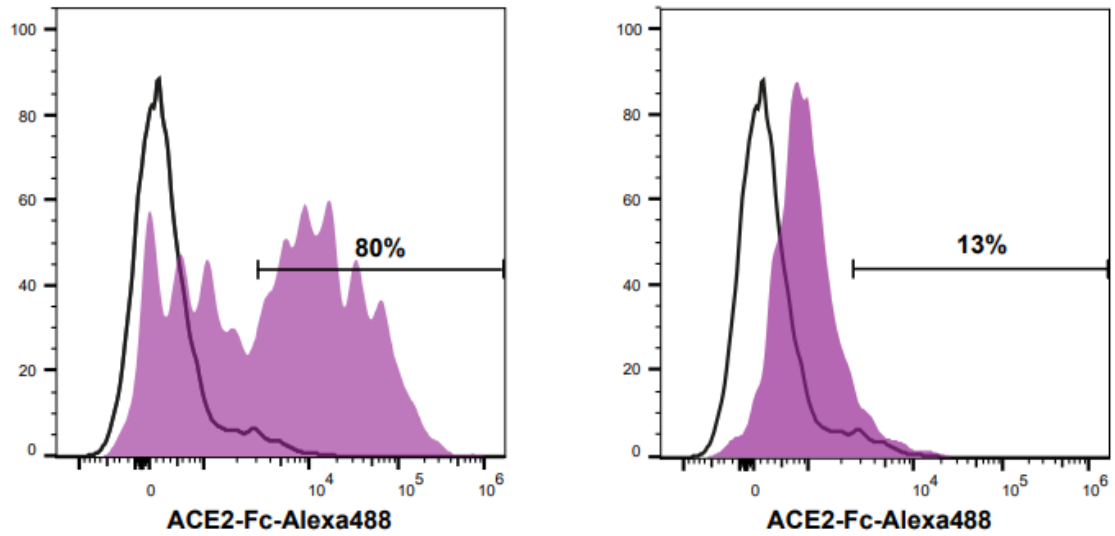

**B**

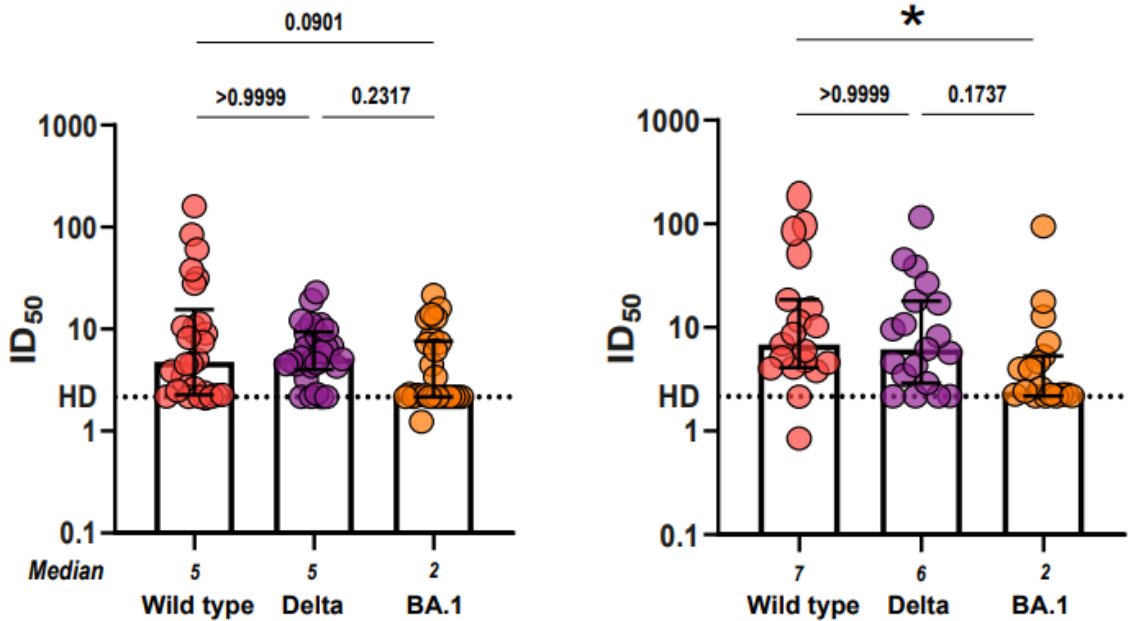

**Supplementary Figure 5. Flow cytometry based surrogate virus neutralization assay (fcVNA).**

A - representative flow plots for HEK293 cells transiently transfected with WT Spike and stained with ACE2-Fc-Alexa488 without addition of patient serum (left panel) or in the presence of patient serum (right panel). Untransfected cells stained with ACE2-Fc-Alexa488 were used as a control (open plots). B - neutralization antibody titers ( $ID_{50}$  values) against WT, Delta, and BA.1 Spike variants in fcVNA.

**A**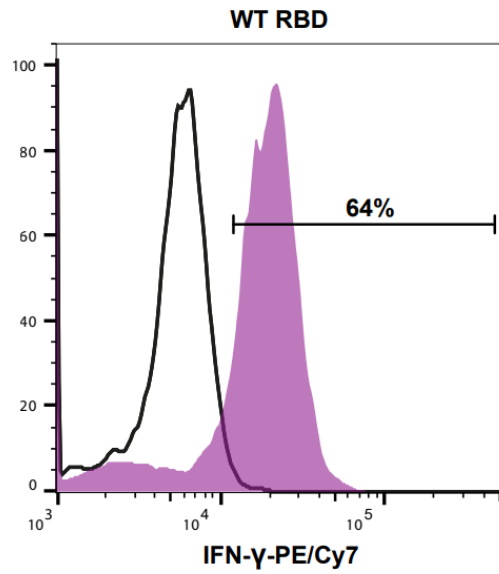**B**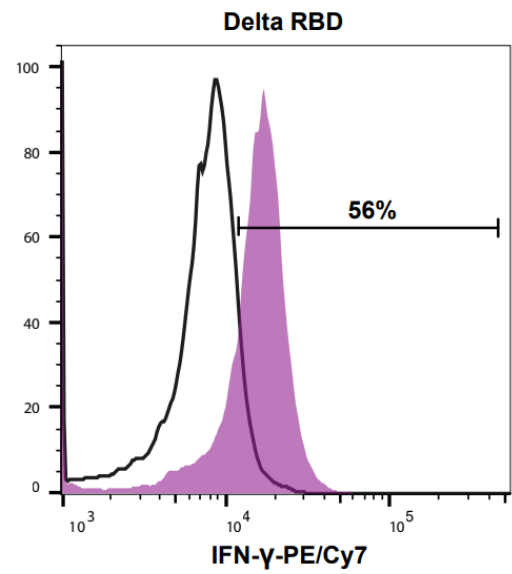

**Supplementary Figure 6. Representative flow plots of antibody-dependent NK cell activation assay (ADNKA).**

NK cells were incubated in wells coated with WT (A) or Delta (B) RBD, then permeabilized and stained with PE/Cy5-labeled antibody for IFN- $\gamma$ . Numbers indicate the percentage of positive events. NK cells from uncoated wells stained with for IFN- $\gamma$ -PE/Cy7 were used as a control (open plots).
